# Supplementary material
Source: PubMed Central journal article supplement (PMC141039)

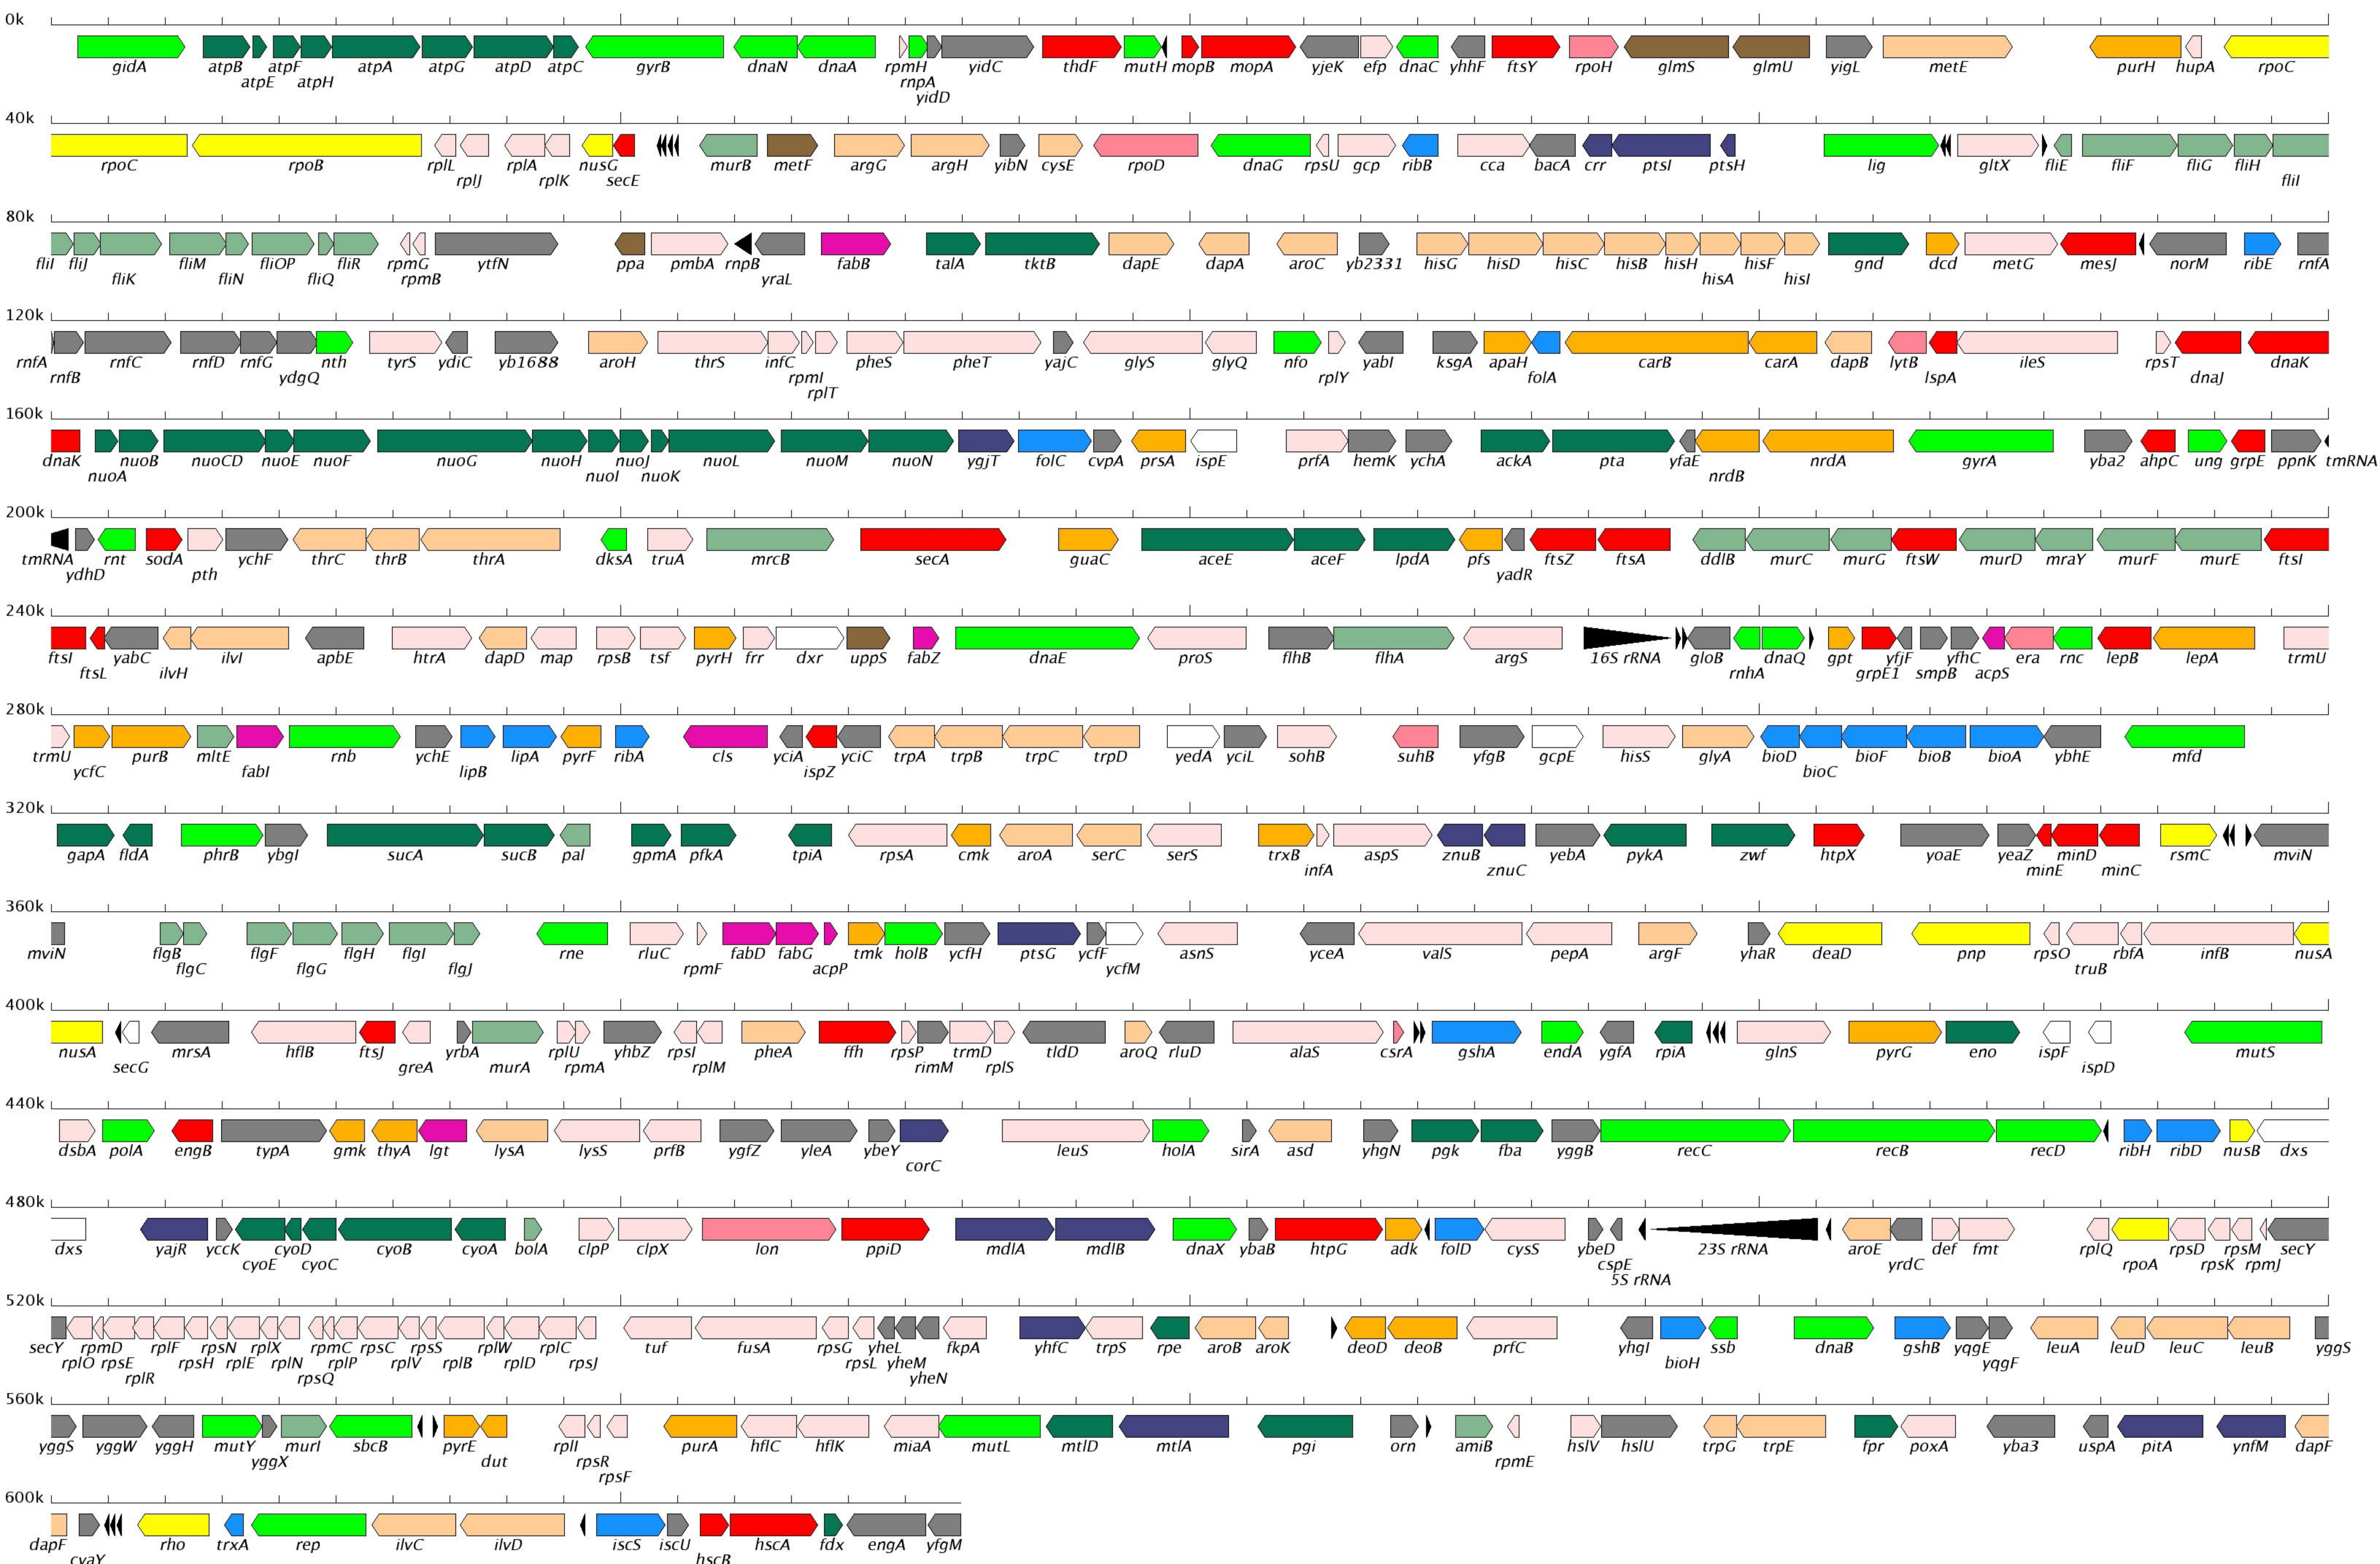

Plasmid:

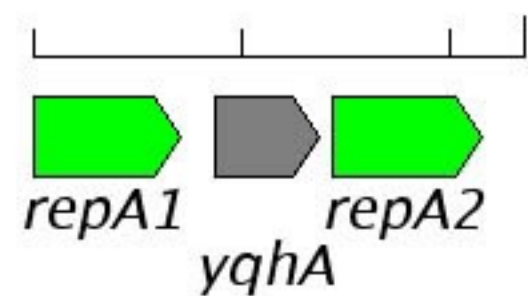

Supplement: pnas_0235981100_3.pdf [file pnas_0235981100_3.pdf]
